# Supplementary material for: Flooding of the apoplast is a key factor in the development of hyperhydricity
Source: J Exp Bot. 2013 Oct 11;64(16):5221–30. doi: 10.1093/jxb/ert315 (PMC3830496; doi:10.1093/jxb/ert315)
Supplement: Supplementary Data [file supp_ert315_jexbot104810_file001.pdf]

**Title:** Flooding of the apoplast is the key factor in the development of hyperhydricity.

**Authors:** Niels van den Dries, Sergio Gianni, Anna Czerednik, Frans A. Krens and Geert-Jan M. de Klerk

## Supplementary Data

**Table S1**

| Gene ID       | AGI ID           | Forward primer ( 5'→3')  | Reverse primer (5'→3')   |
|---------------|------------------|--------------------------|--------------------------|
| <i>ACO</i>    | <i>At2g19590</i> | CTCAGCAAGACGATGGATGA     | TTGGACCAGAAAAGGCATTC     |
| <i>ACT2</i>   | <i>At3g18780</i> | GGTAACATTGTGCTCAGTGGTGG  | AACGACCTTAATCTTCATGCTGC  |
| <i>ADH</i>    | <i>At1g77120</i> | GAATCGCTGGTGCTTCTAGG     | CTCAGCGATCACCTGTTGAA     |
| <i>ETR2</i>   | <i>At3g23150</i> | TTGTGCTACTGCGATTACGC     | CAACTTCACGACCAAGCTCA     |
| <i>NIP2;1</i> | <i>At2g34390</i> | TTACTGTCTCGGCCACCTCT     | CCAAGGTTGATCCGATGACT     |
| <i>PDC1</i>   | <i>At4g33070</i> | GGTGGTCCTAAGTTGCGTGT     | CTGCTCCCCAATAAGTTCCA     |
| <i>PDC2</i>   | <i>At5g54960</i> | CTAATAGTCGTCCCCCAAATCC   | GAACGGTGAAGACACTACCAAA   |
| <i>PFK6</i>   | <i>At4g32840</i> | CGATCTCCCCACTTATCCAA     | GGCCTGCACGTCTAAAATGT     |
| <i>SUS1</i>   | <i>At5g20830</i> | CGCCGTTACCTTGAAATGTT     | CTTCAAACACCGGAACCACT     |
| <i>SUS4</i>   | <i>At3g43190</i> | ACAAACTCAACGGGCAATTC     | AAAGAGCAGGCTGCACAAAT     |
| <i>TUB6</i>   | <i>At5g12250</i> | ACCACTCCTAGCTTTGGTGATCTG | AGGTTCCTGCGAGCTTCCTCA    |
| <i>UBQ10</i>  | <i>At4g05320</i> | CACACTCCACTTGGTCTTGCGT   | TGGTCTTTCCGGTGAGAGTCTTCA |

### Supplementary Figure S1

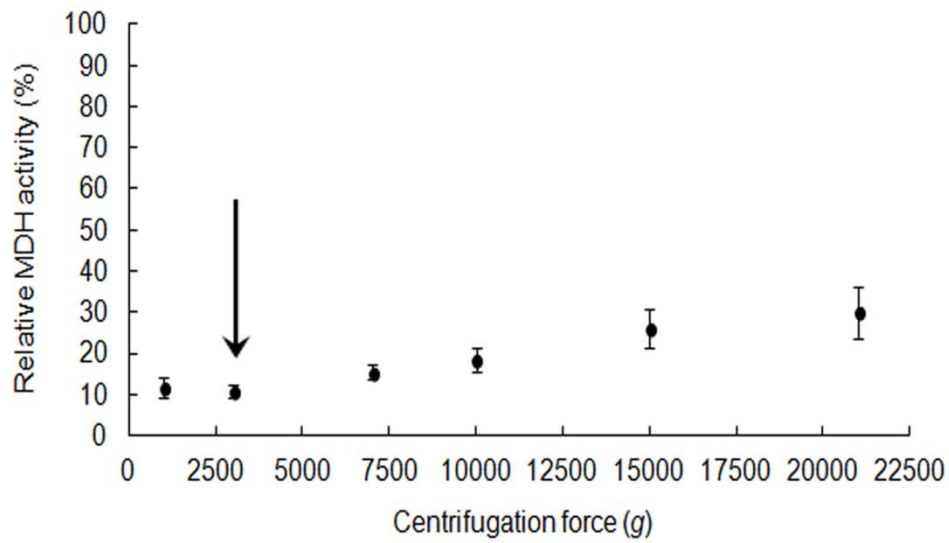

#### Supplementary Fig. S1

Effect of centrifugation force on cytoplasmic contamination in extracted apoplastic water. Contamination of apoplastic water with cytoplasmic components was assessed by measuring the activity of malate dehydrogenase (MDH) at increasing centrifugation forces. The MDH activity in the extracted water was expressed as the percentage of total MDH activity. The standard centrifugation force applied for extracting apoplastic water from leaves was 3000g and is indicated by an arrow. Data points represent means  $\pm$  SE from three independent measurements.

## Supplementary Figure S2

A

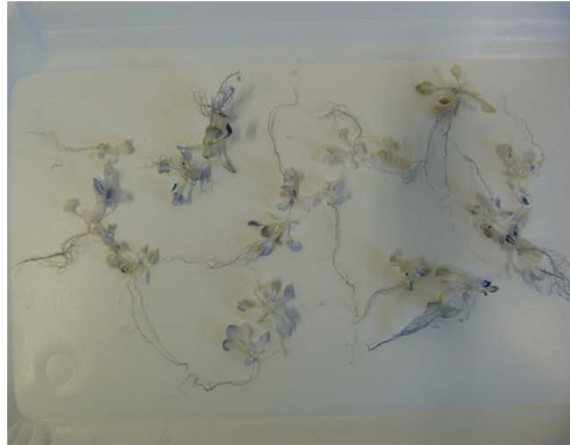

B

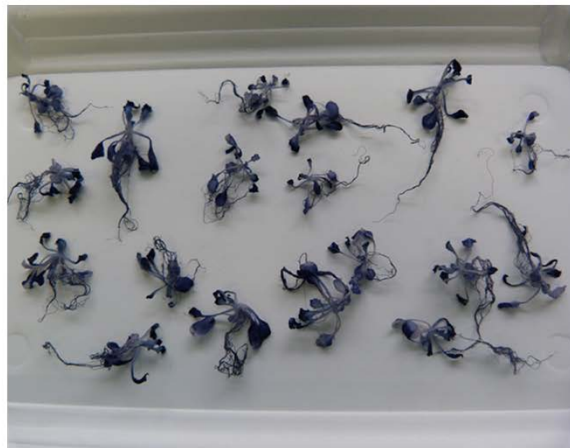

### Supplementary Fig. S2

Visualization of superoxide radicals by nitroblue tetrazolium (NBT) staining. Representative photographs showing the presence of superoxide radicals in (A) non-hyperhydric and (B) hyperhydric *Arabidopsis* seedlings. The presence of superoxide radicals is visualized by a blue precipitate.

### Supplementary Figure S3

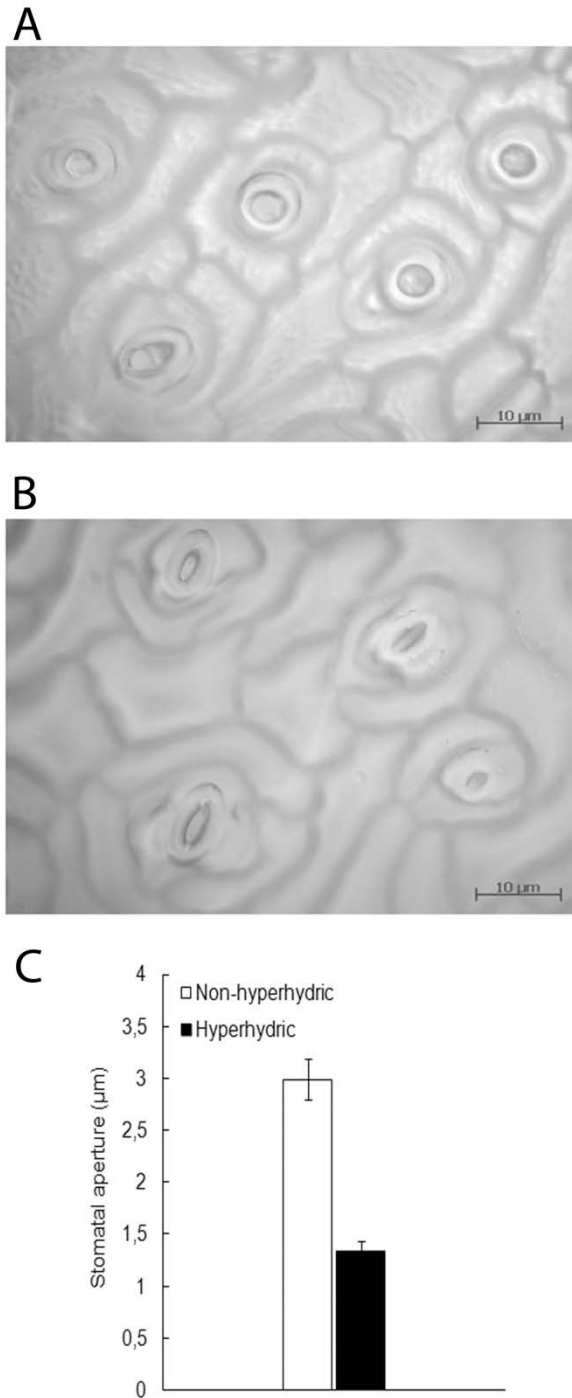

### Supplementary Fig. S3

Influence of HH on stomatal aperture in static plantlets. Microscopic photographs of adaxial leaf impressions of (A) hyperhydric and (B) non-hyperhydric static plantlets. (C) Stomatal apertures in leaves from hyperhydric and non-hyperhydric static plantlets. Each value is the mean of determinations of more than 90 stomata on leaves of three randomly selected plantlets  $\pm$  SE.
